# Supplementary material for: The nitration pattern of energetic 3,6-diamino-1,2,4,5-tetrazine derivatives containing azole functional groups
Source: Royal Society of Chemistry journal article supplement (doi:10.1039/c5dt01641j), 2015-01-01
Supplement: c5dt01641j1.pdf [file c5dt01641j1.pdf]

**Nitration Pattern of Energetic 3,6-Diamino-1, 2, 4, 5-tetrazine Derivatives  
Containing Azole Functional Groups.**

Supporting Information

Alexander Aizikovich, Avital Shlomovich, Adva Cohen and Michael Gozin\*

School of Chemistry, Faculty of Exact Sciences, Tel-Aviv University, Tel-Aviv 69978, Israel

E-mail: cogozin@gmail.com; Phone: +972-3-640-5878.

**Content**

|                                                         |        |
|---------------------------------------------------------|--------|
| X-ray Crystallography                                   | S2-S5  |
| Spectra ( $^1\text{H}/^{13}\text{C}/^{15}\text{N}$ NMR) | S6-S11 |

## X-ray Crystallography

Crystals of **16** suitable for X-ray diffraction were obtained by subjecting a solution of **16** in H<sub>2</sub>O to vapors of perchloric acid, while suitable crystals of compound **20** were obtained by recrystallization from water and DMF. The crystals of **16** and **20**·4DMF. Data were collected using MoK $\alpha$  radiation ( $\lambda = 0.71073$  nm). An Oxford low-temperature device was used to keep the crystals at a constant temperature of 110K, during all data collection period. Details of the X-ray data collection and structure refinements are summarized in Table S1.

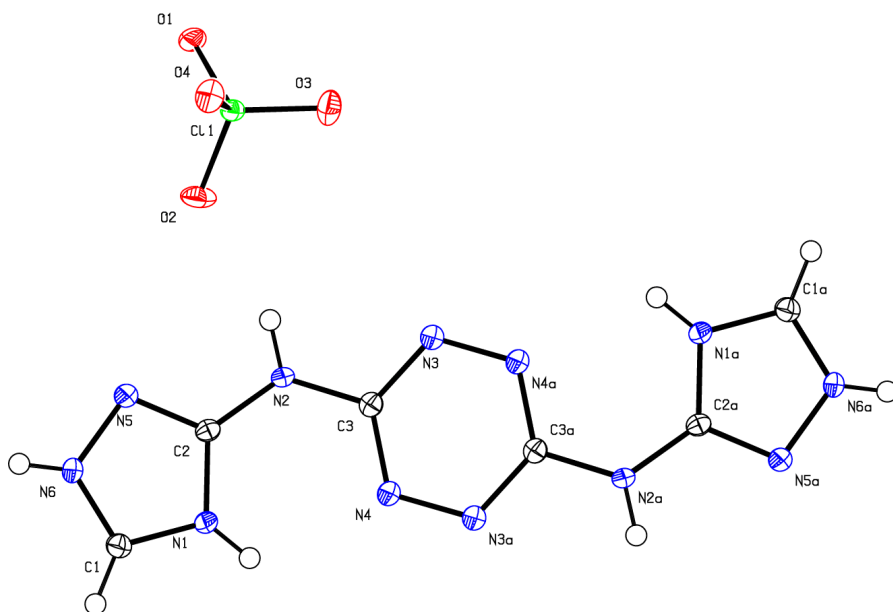

**Figure S1.** Structure of compound **16**, with contour probability level of 50%.

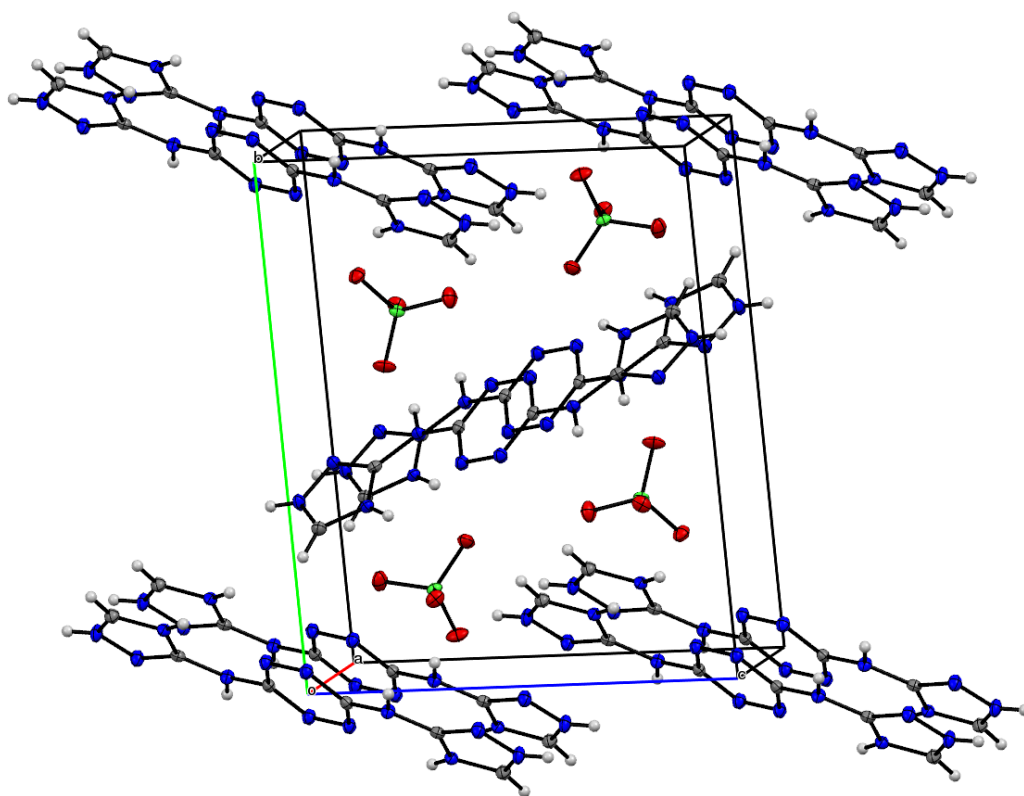

**Figure S2.** Arrangement of molecules of **16** in the obtained crystal.

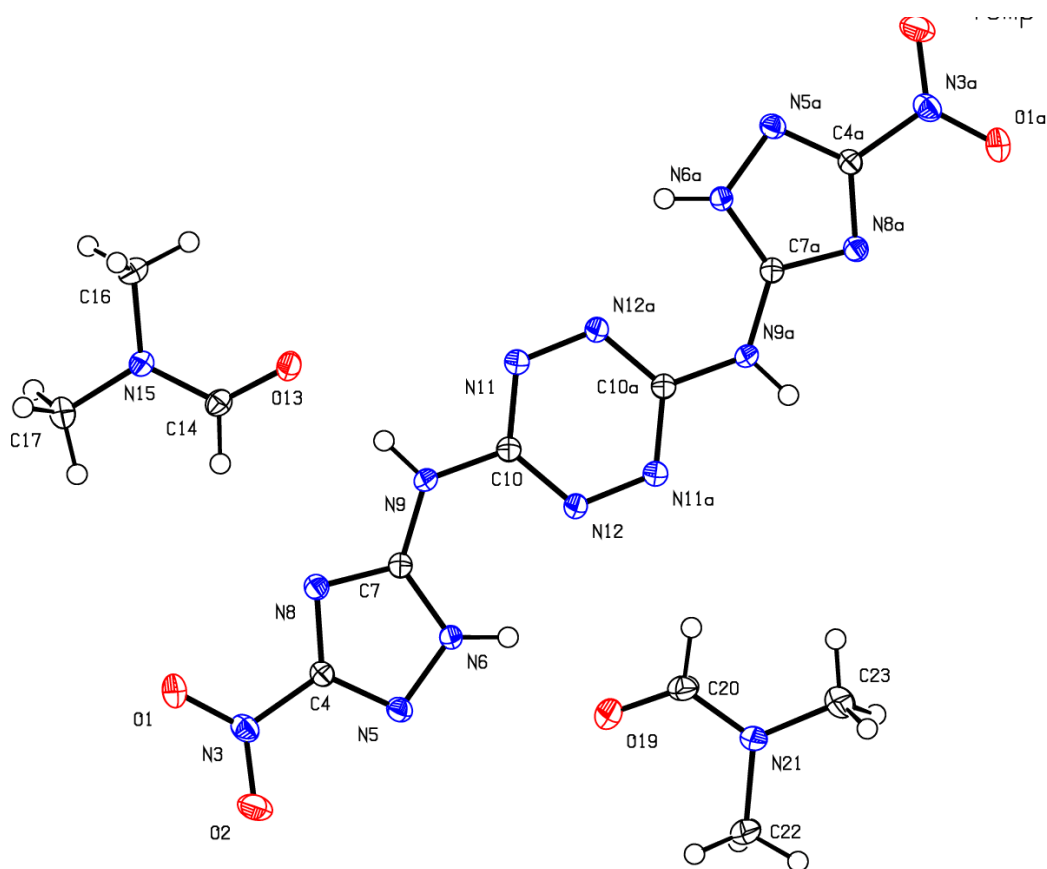

**Figure S3.** Structure of compound **20**, with contour probability level of 50%.

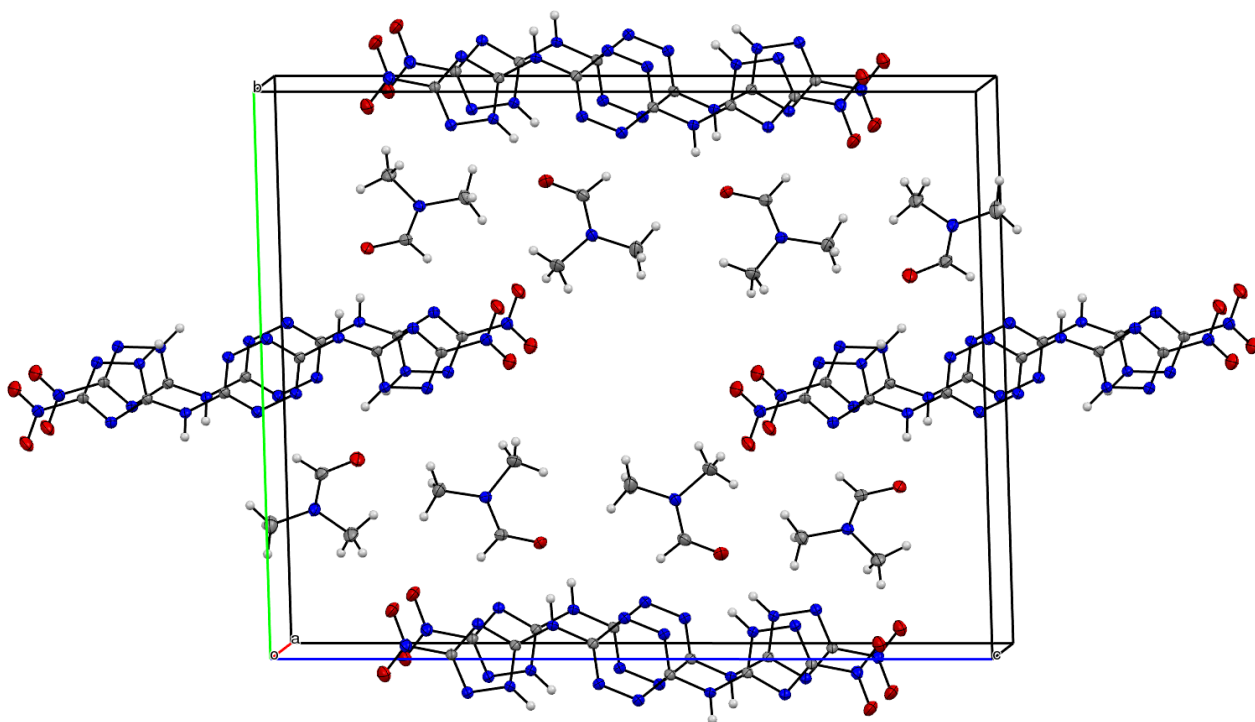

**Figure S4.** Arrangement of molecules of **20** in the obtained crystal.

**Table S1.** Crystallography data for compounds **16** and **20**.

|                                                    | <b>16</b>                                                            | <b>20</b>                                                                                          |
|----------------------------------------------------|----------------------------------------------------------------------|----------------------------------------------------------------------------------------------------|
| <b>Formula</b>                                     | C <sub>6</sub> H <sub>8</sub> N <sub>12</sub> · 2(ClO <sub>4</sub> ) | C <sub>6</sub> H <sub>4</sub> N <sub>14</sub> O <sub>4</sub> · 4(C <sub>3</sub> H <sub>7</sub> NO) |
| <b>FW/ g mol<sup>-1</sup></b>                      | 447.14                                                               | 628.26                                                                                             |
| <b>Color</b>                                       | Yellow                                                               | Orange                                                                                             |
| <b>Habit</b>                                       | Needle                                                               | Needle                                                                                             |
| <b>Crystal size /mm</b>                            | 0.15 × 0.35 × 0.15                                                   | 0.049 × 0.131 × 0.667                                                                              |
| <b>Crystal system</b>                              | monoclinic                                                           | monoclinic                                                                                         |
| <b>Space group</b>                                 | P 2 <sub>1</sub> /c                                                  | P 2 <sub>1</sub> /c                                                                                |
| <b>a/ Å</b>                                        | 4.9063(2)                                                            | 3.8323(4)                                                                                          |
| <b>b/ Å</b>                                        | 13.3753(5)                                                           | 17.6530(19)                                                                                        |
| <b>c/ Å</b>                                        | 11.7380(4)                                                           | 22.906(2)                                                                                          |
| <b>α/ °</b>                                        | 90                                                                   | 90                                                                                                 |
| <b>β/ °</b>                                        | 100.4560(10)                                                         | 93.488(5)                                                                                          |
| <b>γ/ °</b>                                        | 90                                                                   | 90                                                                                                 |
| <b>V/ Å<sup>3</sup></b>                            | 757.49(5)                                                            | 1546.76                                                                                            |
| <b>Z</b>                                           | 2                                                                    | 2                                                                                                  |
| <b><i>p</i><sub>calcd.</sub>/g·cm<sup>-3</sup></b> | 1.960                                                                | 1.350                                                                                              |
| <b>T /K</b>                                        | 110 (2)                                                              | 110 (2)                                                                                            |
| <b>F (000)</b>                                     | 452                                                                  | 660                                                                                                |
| <b>μ/ mm<sup>-1</sup></b>                          | 0.508                                                                | 0.109                                                                                              |
| <b>Absorption correction</b>                       | multi-scan                                                           | multi-scan                                                                                         |
| <b>Dataset (h; k; l)</b>                           | -5:6; -17:16; -15:12                                                 | -4:4; -20:20; -26:27                                                                               |
| <b>θ range /°</b>                                  | 2.331:28.354                                                         | 3.73:24.7                                                                                          |
| <b>Reflections collected</b>                       | 7325                                                                 | 11663                                                                                              |
| <b>Independent reflections</b>                     | 1882                                                                 | 2732                                                                                               |
| <b>R<sub>int.</sub></b>                            | 0.0197                                                               | 0.0252                                                                                             |
| <b>Parameters</b>                                  | 139                                                                  | 204                                                                                                |
| <b>R1 [I&gt;2σ(I)]</b>                             | 0.0297                                                               | 0.0398                                                                                             |
| <b>WR2 [I&gt;2σ(I)]</b>                            | 0.0719                                                               | 0.1182                                                                                             |
| <b>R<sub>1</sub> (all data)</b>                    | 0.0328                                                               | 0.0451                                                                                             |
| <b>wR2 (all data)</b>                              | 0.0741                                                               | 0.1223                                                                                             |
| <b>S</b>                                           | 1.055                                                                | 1.046                                                                                              |
| <b>Res. dens. /e·Å<sup>-3</sup></b>                | 0.063                                                                | 0.057                                                                                              |
| <b>Solution</b>                                    | SHELXTL-2014                                                         | SHELXL-2013                                                                                        |
| <b>Refinement</b>                                  | SHELXL-2014/6                                                        | SHELXS-97                                                                                          |

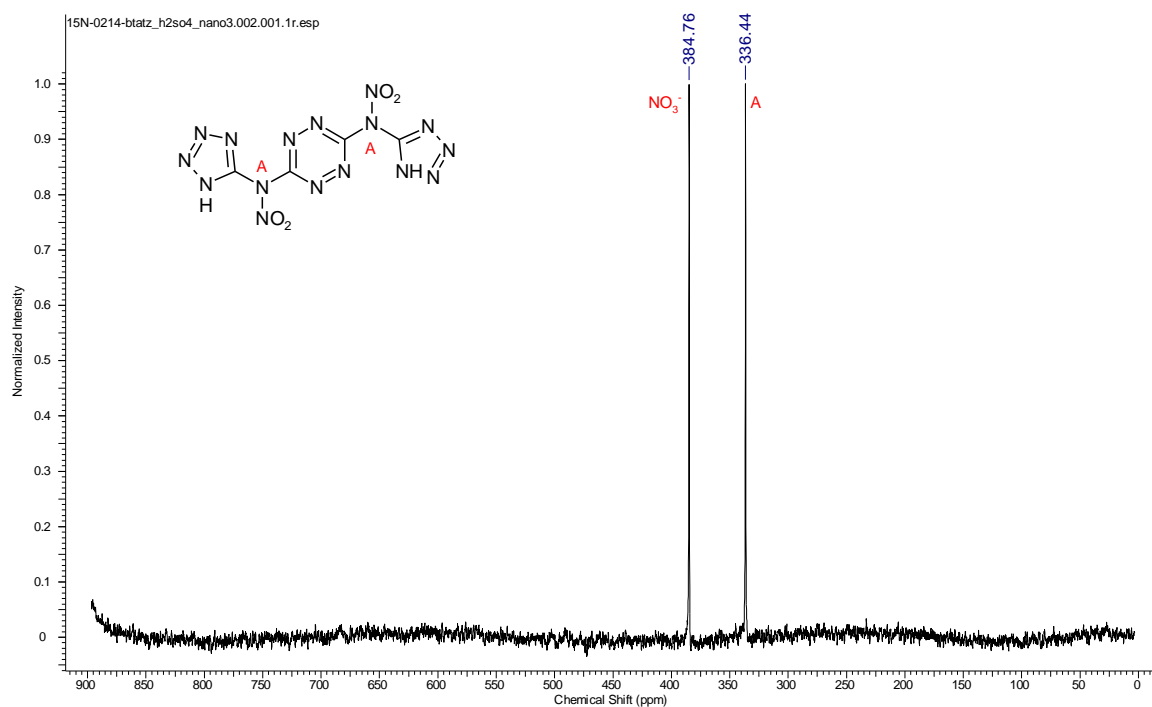

**Figure S5.** Study of nitration of compound **5** by <sup>15</sup>N NMR. Reaction conditions: H<sub>2</sub>SO<sub>4</sub>, Na<sup>15</sup>NO<sub>3</sub>.

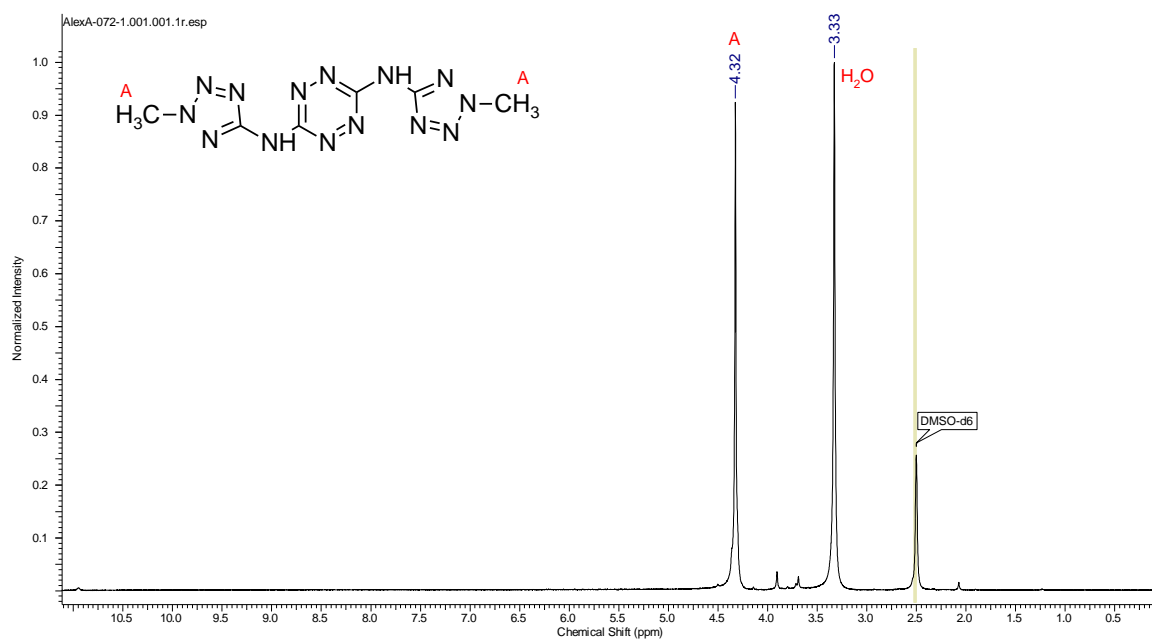

**Figure S6.** <sup>1</sup>H NMR of compound **12**.

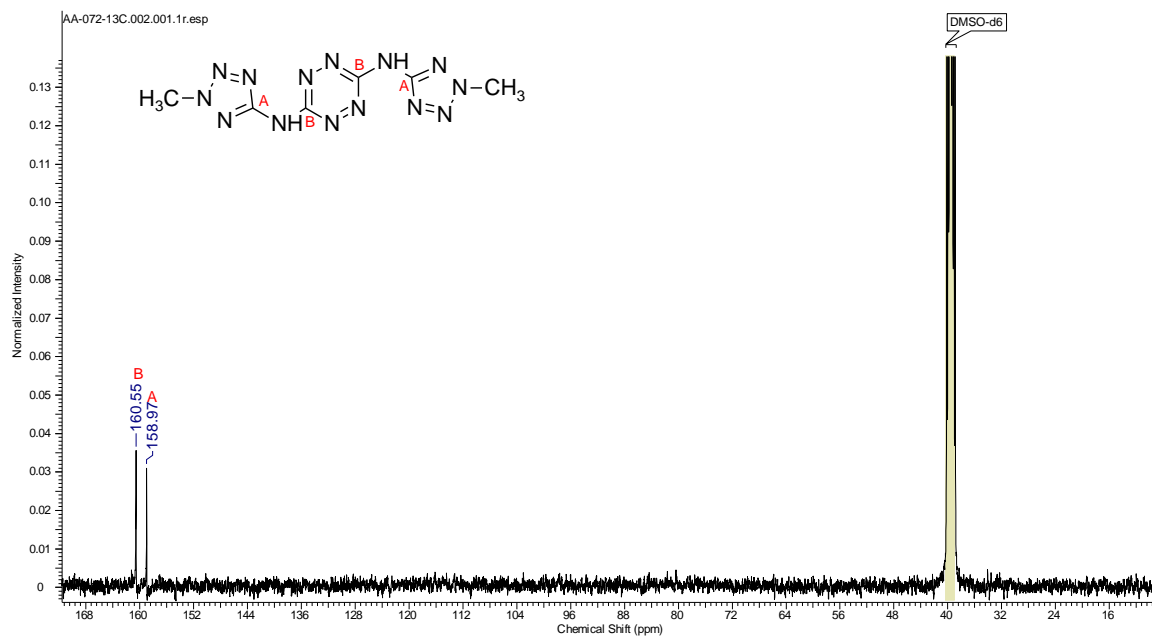

Figure S7.  $^{13}\text{C}$  NMR of compound 12.

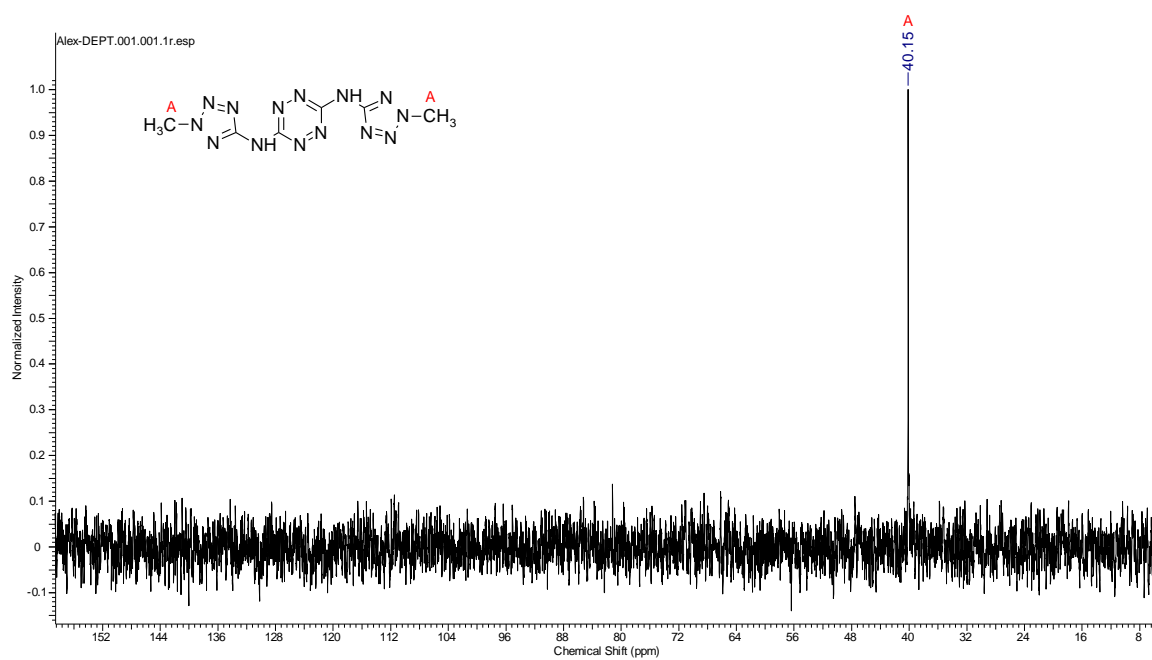

Figure S8.  $^{13}\text{C}$  DEPT135 NMR of compound 12.

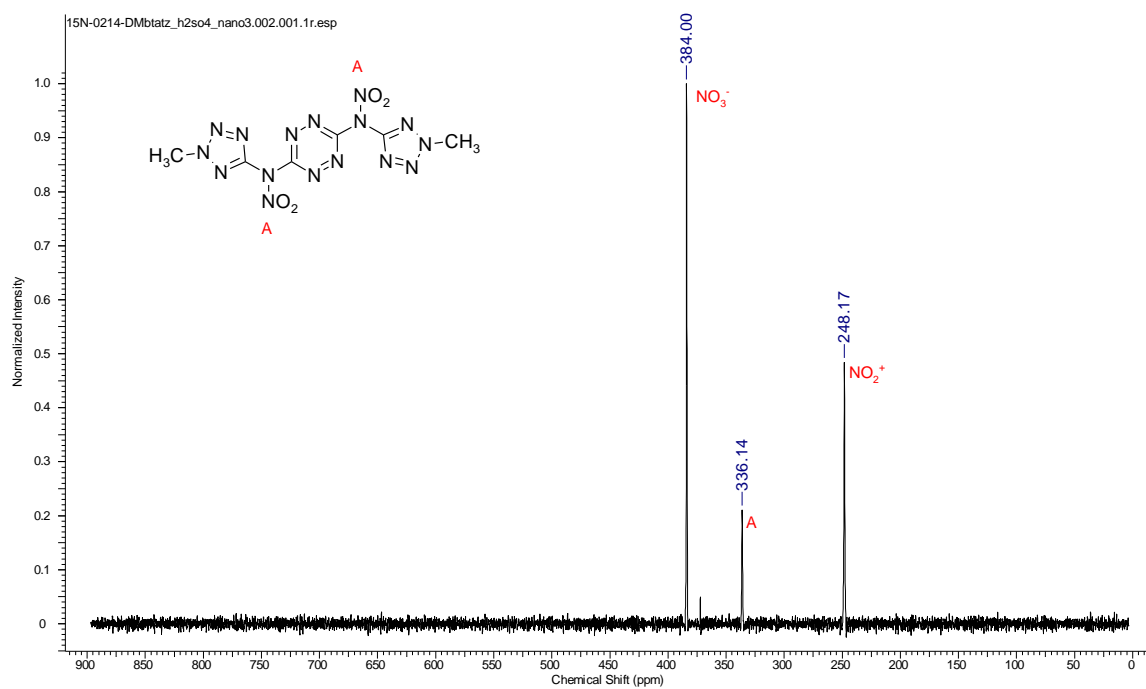

**Figure S9.** Study of nitration of compound 12 by  $^{15}\text{N}$  NMR. *Reaction conditions:*  $\text{H}_2\text{SO}_4$ ,  $\text{Na}^{15}\text{NO}_3$ .

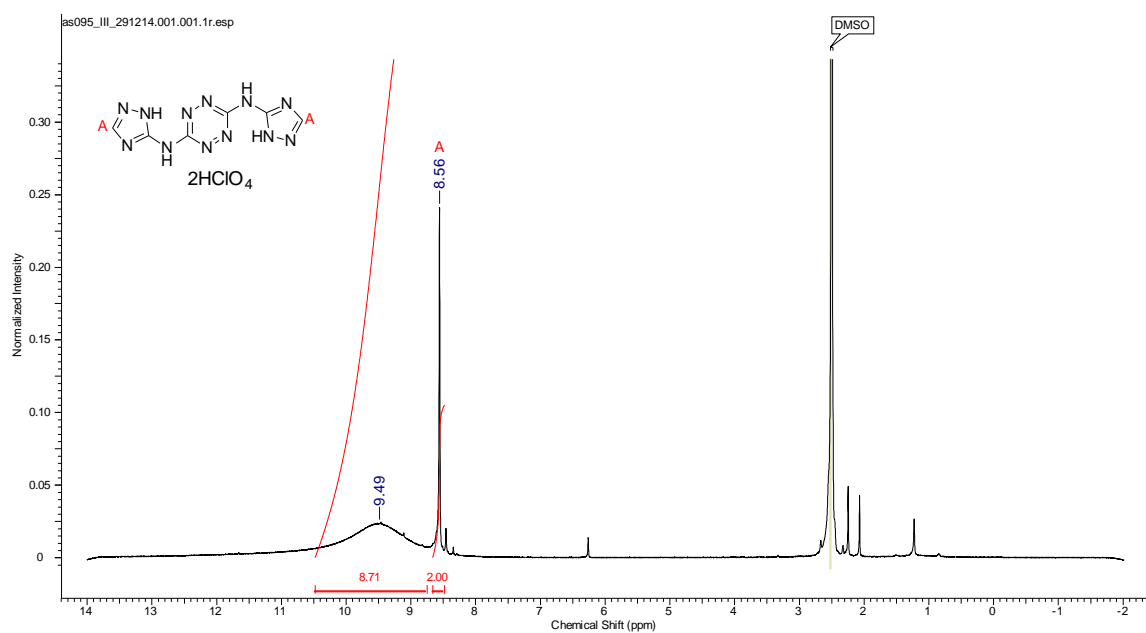

**Figure S10.**  $^1\text{H}$  NMR of compound 16.



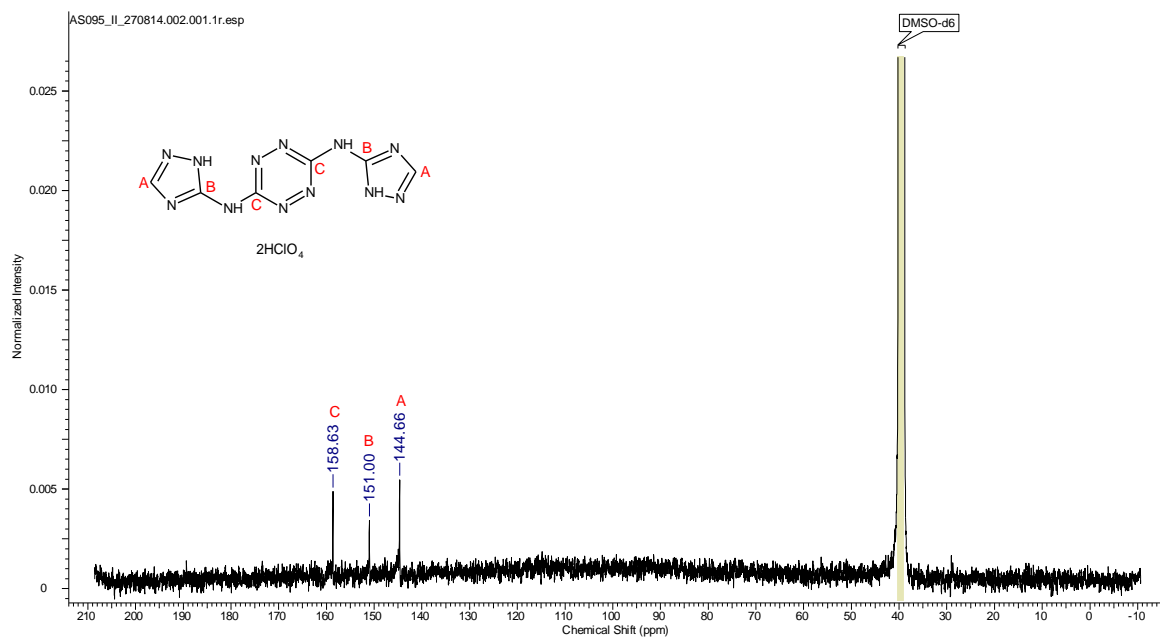

Figure S11. <sup>13</sup>C NMR of compound 16.

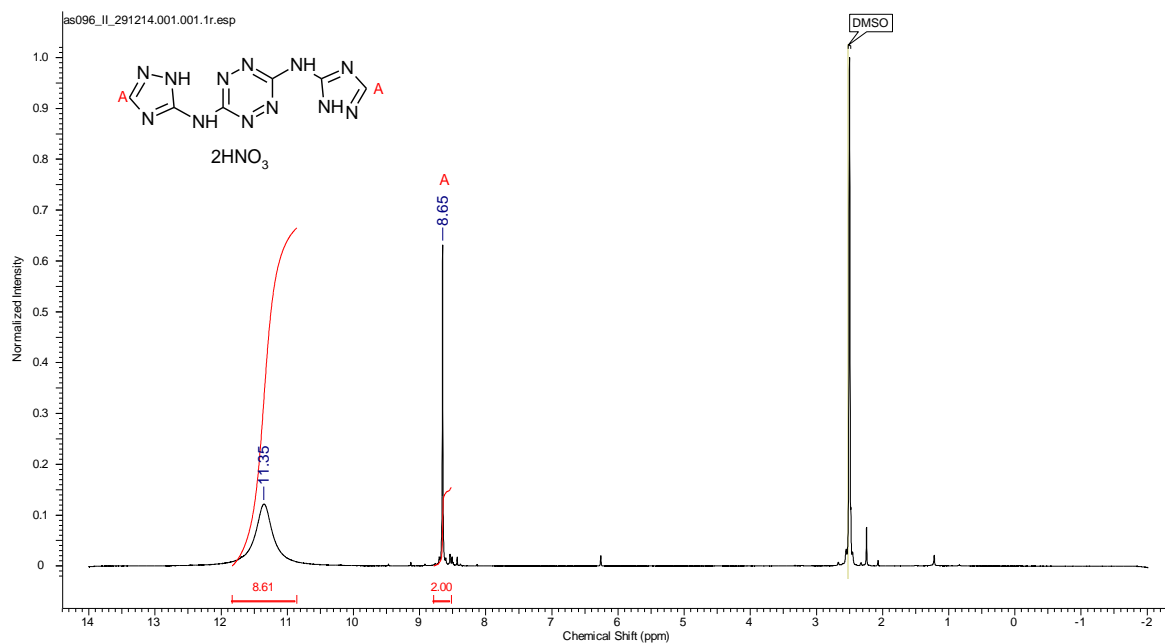

Figure S12. <sup>1</sup>H NMR of compound 17.

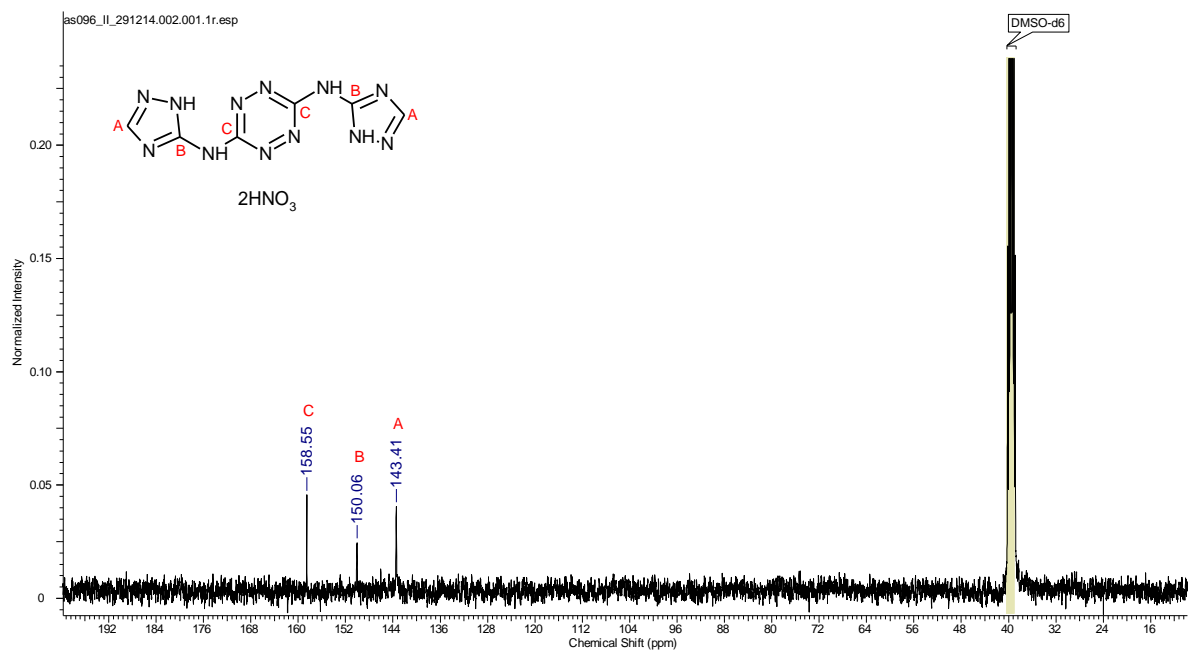

Figure S13.  $^{13}\text{C}$  NMR of compound 17.

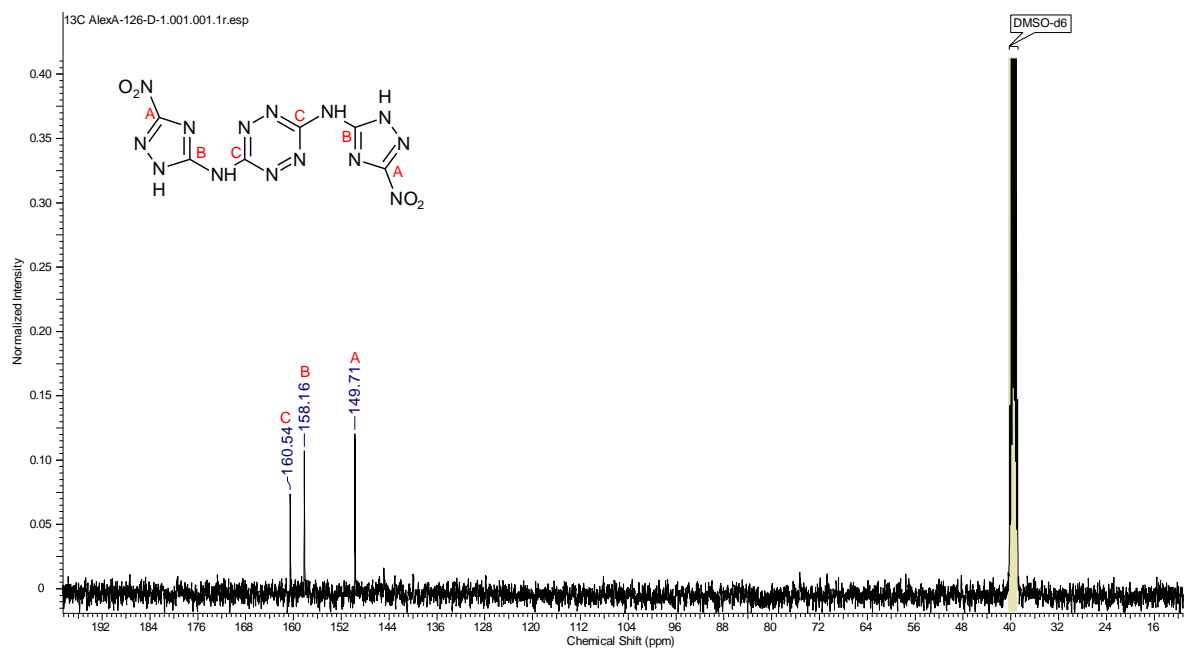

Figure S14.  $^{13}\text{C}$  NMR of compound 20.

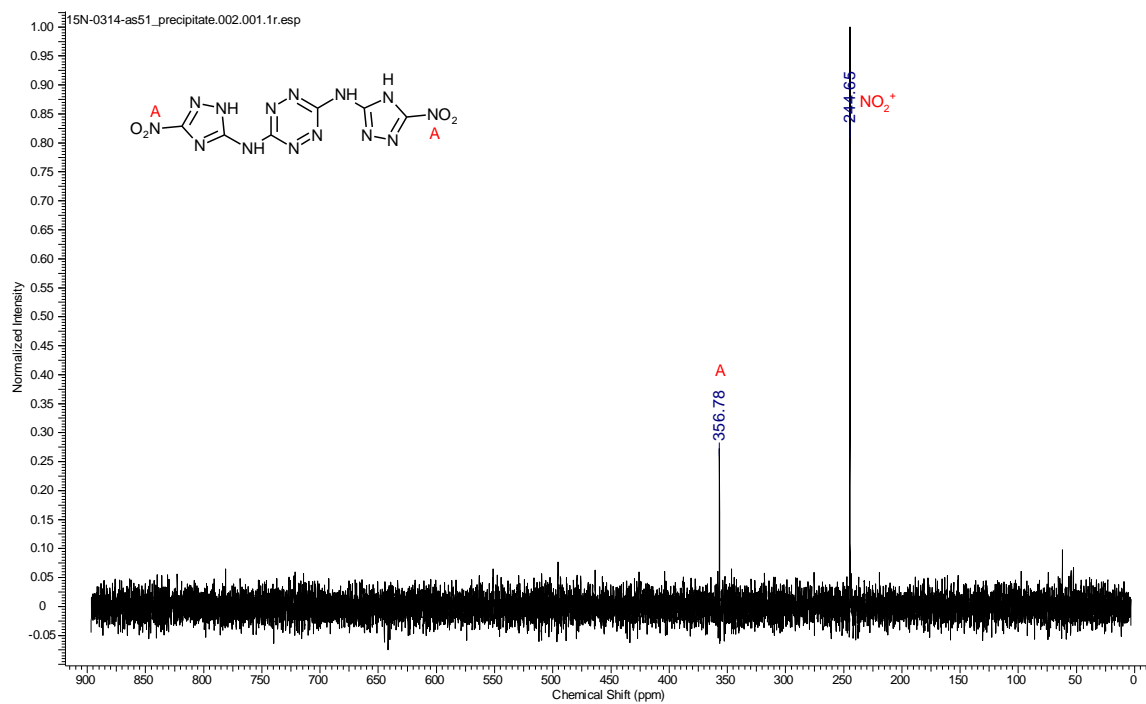

**Figure S15.** Study of the formation of compound **20** by <sup>15</sup>N NMR. *Reaction conditions:* Ac<sub>2</sub>O, Na<sup>15</sup>NO<sub>3</sub>, HNO<sub>3</sub>.
